# Supplementary material
Source: PubMed Central journal article supplement (PMC6602133)
Supplement: 10.1194_S093815_jlr.S093815-3.pdf [file 10.1194_S093815_jlr.S093815-3.pdf]

# **Ceramide synthase inhibition by fumonisins—a “perfect storm” of perturbed sphingolipid metabolism, signaling and disease**

Ronald T. Riley and Alfred H. Merrill, Jr.

for *The Journal of Lipid Research Perspectives*, 2019

## **Supplement C. Additional information on CerS2 KO mice**

CerS2 knockout mice (1) have altered renal architecture (2), develop hepatocarcinomas (2, 3), have increased susceptibility to diethylnitrosamine-induced liver tumorigenesis (4) and develop pheochromocytoma (5). Biophysical effects of CerS2 knockout (6) include changes in membrane fluidity, phase separation, curvature and morphology, and hepatic plasma membrane functions such as receptor internalization (7), clathrin-mediated endocytosis (8), TNF $\alpha$  secretion (9) and gap junction activity (10). ROS generation from mitochondria is elevated due to impaired complex IV activity, and although levels of anti-oxidant enzymes are elevated, lipid peroxidation, protein nitrosylation, and ROS increase (8, 11). CerS6 knockout also induces apoptosis via activation ATF-6, a transcription activator that initiates the unfolded protein response (UPR) during endoplasmic reticulum stress (12).

## **References**

1. Pewzner-Jung, Y., H. Park, E. L. Laviad, L. C. Silva, S. Lahiri, J. Stiban, R. Erez-Roman, B. Brugger, T. Sachsenheimer, F. Wieland, M. Prieto, A. H. Merrill, Jr., and A. H. Futerman. 2010. A critical role for ceramide synthase 2 in liver homeostasis: I. alterations in lipid metabolic pathways. *J Biol Chem* **285**: 10902-10910.
2. Imgrund, S., D. Hartmann, H. Farwanah, M. Eckhardt, R. Sandhoff, J. Degen, V. Gieselmann, K. Sandhoff, and K. Willecke. 2009. Adult ceramide synthase 2 (CERS2)-deficient mice exhibit myelin sheath defects, cerebellar degeneration, and hepatocarcinomas. *J Biol Chem* **284**: 33549-33560.

3. Pewzner-Jung, Y., O. Brenner, S. Braun, E. L. Laviad, S. Ben-Dor, E. Feldmesser, S. Horn-Saban, D. Amann-Zalcenstein, C. Raanan, T. Berkutzki, R. Erez-Roman, O. Ben-David, M. Levy, D. Holzman, H. Park, A. Nyska, A. H. Merrill, Jr., and A. H. Futerman. 2010. A critical role for ceramide synthase 2 in liver homeostasis: II. insights into molecular changes leading to hepatopathy. *J Biol Chem* **285**: 10911-10923.
4. Chen, L., X. Lu, T. Zeng, Y. Chen, Q. Chen, W. Wu, X. Yan, H. Cai, Z. Zhang, Q. Shao, and W. Qin. 2014. Enhancement of DEN-induced liver tumorigenesis in hepatocyte-specific Lass2-knockout mice coincident with upregulation of the TGF-beta1-Smad4-PAI-1 axis. *Oncol Rep* **31**: 885-893.
5. Park, W. J., O. Brenner, A. Kogot-Levin, A. Saada, A. H. Merrill, Jr., Y. Pewzner-Jung, and A. H. Futerman. 2015. Development of pheochromocytoma in ceramide synthase 2 null mice. *Endocr Relat Cancer* **22**: 623-632.
6. Silva, L. C., O. Ben David, Y. Pewzner-Jung, E. L. Laviad, J. Stiban, S. Bandyopadhyay, A. H. Merrill, Jr., M. Prieto, and A. H. Futerman. 2012. Ablation of ceramide synthase 2 strongly affects biophysical properties of membranes. *Journal of lipid research* **53**: 430-436.
7. Ali, M., J. Fritsch, H. Zigdon, Y. Pewzner-Jung, S. Schutze, and A. H. Futerman. 2013. Altering the sphingolipid acyl chain composition prevents LPS/GLN-mediated hepatic failure in mice by disrupting TNFR1 internalization. *Cell Death Dis* **4**: e929.
8. Volpert, G., S. Ben-Dor, O. Tarcic, J. Duan, A. Saada, A. H. Merrill, Jr., Y. Pewzner-Jung, and A. H. Futerman. 2017. Oxidative stress elicited by modifying the ceramide acyl chain length reduces the rate of clathrin-mediated endocytosis. *J Cell Sci* **130**: 1486-1493.
9. Ali, M., A. Saroha, Y. Pewzner-Jung, and A. H. Futerman. 2015. LPS-mediated septic shock is augmented in ceramide synthase 2 null mice due to elevated activity of TNFalpha-converting enzyme. *FEBS Lett* **589**: 2213-2217.
10. Park, W. J., J. W. Park, R. Erez-Roman, A. Kogot-Levin, J. R. Bame, B. Tirosh, A. Saada, A. H. Merrill, Jr., Y. Pewzner-Jung, and A. H. Futerman. 2013. Protection of a ceramide synthase 2 null mouse from drug-induced liver injury: role of gap junction dysfunction and connexin 32 mislocalization. *J Biol Chem* **288**: 30904-30916.
11. Zigdon, H., A. Kogot-Levin, J. W. Park, R. Goldschmidt, S. Kelly, A. H. Merrill, Jr., A. Scherz, Y. Pewzner-Jung, A. Saada, and A. H. Futerman. 2013. Ablation of ceramide synthase 2 causes chronic oxidative stress due to disruption of the mitochondrial respiratory chain. *J Biol Chem* **288**: 4947-4956.
12. Senkal, C. E., S. Ponnusamy, Y. Manevich, M. Meyers-Needham, S. A. Saddoughi, A. Mukhopadhyay, P. Dent, J. Bielawski, and B. Ogretmen. 2011. Alteration of ceramide synthase 6/C16-ceramide induces activating transcription factor 6-mediated endoplasmic reticulum (ER) stress and apoptosis via perturbation of cellular Ca<sup>2+</sup> and ER/Golgi membrane network. *J Biol Chem* **286**: 42446-42458.
